# Supplementary material
Source: PubMed Central journal article supplement (PMC10615782)
Supplement: NIHMS1931858-supplement-13.pdf [file NIHMS1931858-supplement-13.pdf]

**Table S1. Properties of avian and mammalian MXRA8 receptor activity for alphaviruses, Related to Figure 1**

| <b>Virus</b> | <b>Infection enhanced by avian MXRA8</b> | <b>Infection enhanced by mammalian MXRA8</b> | <b>Infection inhibited by chicken MXRA8-Fc</b> | <b>Infection inhibited by knockout of chicken MXRA8</b> | <b>Cell line used</b>         |
|--------------|------------------------------------------|----------------------------------------------|------------------------------------------------|---------------------------------------------------------|-------------------------------|
| SINV         | ✓                                        | X                                            | ✓                                              | ✓                                                       | 3T3, CEFs, 293T, HeLa, Jurkat |
| WEEV         | ✓                                        | X                                            | ✓                                              | -                                                       | 3T3, CEFs                     |
| WHAV         | ✓                                        | X                                            | ✓                                              | -                                                       | 3T3, CEFs                     |
| BABV         | ✓                                        | X                                            | ✓                                              | -                                                       | 3T3, CEFs                     |
| OCKV         | ✓                                        | X                                            | ✓                                              | ✓                                                       | 3T3, CEFs,                    |
| AURA         | X                                        | X                                            | X                                              | X                                                       | 3T3, CEFs, 293T, HeLa         |
| CHIKV 181/25 | X                                        | ✓                                            | -                                              | -                                                       | 3T3, CEFs, 293T, HeLa, Jurkat |
| CHIKV 37997  | X                                        | ✓                                            | -                                              | -                                                       | 293T                          |
| SINV-EEEV    | X                                        | X                                            | -                                              | X                                                       | 3T3, K562                     |
| SINV-VEEV    | X                                        | X                                            | -                                              | -                                                       | 3T3, Jurkat                   |

✓, yes; X, no; -, not tested.

**Table S2. Cryo-EM model building and refinement statistics, Related to Figures 3 and 7**

| Asymmetric Unit Model    |                  | WEEV-VLP alone (EMDB-27272 PDB: 8DAQ) | WEEV-VLP + duck Mxra8 (EMDB-27271 PDB: 8DAN) | CHIKV-VLP + Du-D1-Mo-D2 (EMDB-28644 PDB: 8EWF) | WEEV-VLP + Du-D1-Mo-D2 (EMDB-40711 PDB: 8SQN) |
|--------------------------|------------------|---------------------------------------|----------------------------------------------|------------------------------------------------|-----------------------------------------------|
| # of chains              |                  | 8                                     | 12                                           | 9                                              | 9                                             |
| # of residues            |                  | 3412                                  | 4472                                         | 3697                                           | 3677                                          |
| # of carbohydrates       |                  | 8                                     | 12                                           | 9                                              | 9                                             |
| Resolution (Å)           |                  | 4.35                                  | 4.74                                         | 3.96                                           | 3.89                                          |
| MolProbity Score         |                  | 1.98                                  | 1.84                                         | 2.25                                           | 1.91                                          |
| All-atom clash score     |                  | 13.52                                 | 10.23                                        | 21.25                                          | 12.07                                         |
| Rotamer outliers (%)     |                  | 0.00                                  | 0.00                                         | 0.00                                           | 0.00                                          |
| C $\beta$ outliers       |                  | 0.00                                  | 0.00                                         | 0.00                                           | 0.00                                          |
| Ramachandran Plot Values | Favored (%)      | 95.05                                 | 95.50                                        | 93.42                                          | 95.52                                         |
|                          | Allowed (%)      | 4.95                                  | 4.50                                         | 6.58                                           | 4.48                                          |
|                          | Outlier (%)      | 0.00                                  | 0.00                                         | 0.00                                           | 0.00                                          |
| R.M.S. Deviations        | Bond lengths (Å) | 0.003                                 | 0.002                                        | 0.004                                          | 0.003                                         |
|                          | Bond angles (°)  | 0.554                                 | 0.517                                        | 0.679                                          | 0.598                                         |
| Correlation Coefficient  |                  | 0.75                                  | 0.68                                         | 0.71                                           | 0.72                                          |

**Table S3. List of contact residues of duck MXRA8 (bound to WEEV-VLP), Du-D1-Mo-D2 (bound to WEEV-VLP), mouse MXRA8 (bound to CHIKV-VLP), or Du-D1-Mo-D2 MXRA8 (bound to CHIKV-VLP), Related to Figures 3 and 7**

| E1-E2 heterodimer | MXRA8 domain | Duck Mxra8 (+ WEEV) residues<br>PDB: 8DAN                                                  | Du-D1-Mo-D2 (+ WEEV) residues                                                               | Mouse Mxra8 (+ CHIKV) residues<br>PDB: 6NK6                                                                                           | Du-D1-Mo-D2 (+ CHIKV) residues<br>PDB: 8EWF                                                   |
|-------------------|--------------|--------------------------------------------------------------------------------------------|---------------------------------------------------------------------------------------------|---------------------------------------------------------------------------------------------------------------------------------------|-----------------------------------------------------------------------------------------------|
| Wrap              | Domain-I     | N114(1),<br>T117(8),<br>D118(20),<br>R190(12),<br>T195(2)                                  | T117(1),<br>R190(8),<br>R197(4)                                                             | Q83(1),<br>R84(16),<br>R86(2),<br>Y91(1),<br>A93(1),<br>G94(1),<br>E95(7),<br>R97(14),<br>H139(3),<br>H141(2),<br>H141(1),<br>D146(4) | M86(5), R88(2),<br>Y93(4), A95(1),<br>G96(2),<br>D97(17),<br>R99(1),<br>H141(2),<br>Y148(12)  |
|                   | Domain-II    | None                                                                                       | None                                                                                        | P56(3),<br>R57(8),<br>V59(2), T61(1),<br>D63(14),<br>R64(5), L65(5),<br>H66(5),<br>N247(1),<br>A250(4),<br>R251(9),                   | P56(5), V59(1),<br>D63(7), R64(9),<br>L65(27),<br>N66(1),<br>A252(2),<br>R253(15),<br>D255(3) |
| intra             | Domain-I     | Y81(5),<br>A95(1),<br>R99(7),<br>S103(6),<br>Y104(16),<br>Q106(4),<br>T117(1),<br>A129(2), | A95(9),<br>G96(2),<br>S103(5),<br>Y104(18),<br>Q106(2),<br>R108(1),<br>T117(2),<br>D127(2), | H115(2),<br>D194(5),<br>H196(21),<br>E198(7)                                                                                          | E196(1)                                                                                       |
|                   | Domain-II    | R64(30),<br>L65(3),<br>E201(3)                                                             | D63(1),<br>R64(4),<br>L65(9),<br>N66(11),<br>E201(4)                                        | Q62(1),<br>P236(2),<br>D240(1),<br>E260(1)                                                                                            | E201(3),<br>S229(7),<br>F239(11)                                                              |
| inter             | Domain-I     | Y81(2),<br>G82(13),<br>D83(7),<br>N84(2)                                                   | D83(6)                                                                                      | None                                                                                                                                  | None                                                                                          |

|  |           |      |      |                                                                                              |      |
|--|-----------|------|------|----------------------------------------------------------------------------------------------|------|
|  | Domain-II | None | None | L210(3),<br>P211(5),<br>G212(5),<br>S214(1),<br>F237(2),<br>R263(12),<br>A264(4),<br>E266(3) | None |
|--|-----------|------|------|----------------------------------------------------------------------------------------------|------|

Close-contacts between atomic coordinates are defined as the heavy atoms within 0.39 nm.

Number of contacts per residue are indicated within parentheses.

**Table S4. List of contact residues of WEEV-VLP bound to duck MXRA8 (PDB: 8DAN) or Du-D1-Mo-D2 MXRA8 (PDB: 8SQN) and CHIKV-VLP bound to mouse MXRA8 (PDB: 6NK6) or Du-D1-Mo-D2 (PDB: 8EWF), Related to Figures 3 and 7**

| E1-E2 heterodimer | E1-E2 domain       | WEEV residues (duck MXRA8)                                   | WEEV residues (Du-D1-Mo-D2)                         | CHIKV residues (mouse MXRA8)                                                                      | CHIKV residues (Du-D1-Mo-D2)                                                |
|-------------------|--------------------|--------------------------------------------------------------|-----------------------------------------------------|---------------------------------------------------------------------------------------------------|-----------------------------------------------------------------------------|
| Wrap              | E1 Domain-II       | Y85(27), S98(3), K223(1), V226(10), K227(2)                  | Y85(8), S225(1), K227(4)                            | Y85(8), F87(5), W89(1), D97(2), A98(1), A226(1)                                                   | Y85(2), F87(3), D97(16)                                                     |
|                   | E2 Domain-A        | None                                                         | None                                                | H18(1), E24(1), H26(6), S27(14), C28(4), H29(3), S72(1), T74(7), R119(12), K120(2), I121(2)       | C22(2), G23(1), E24(7), H26(33), C28(1), D71(3), R119(15), K120(6), I121(1) |
|                   | E2 Domain-B        | None                                                         | None                                                | R178(2), T179(5), M181(1), T182(3), T191(5), V192(1), N193(5), T213(1), D214(7), I222(1), D223(8) | T179(2), T182(6), Q183(4), Q184(2), N193(5), D214(2), D223(5)               |
| intra             | E1 Domain-I        | V34(1), S35(4), R134(1), T141(1), R143(16), D145(5), R157(5) | V34(4), S35(1), K130(2), R134(3), R143(12), D145(6) | K132(1), T143(1), Y147(2)                                                                         | S130(1), K132(2), A145(6)                                                   |
|                   | E1 Domain-II       | E262(5), E264(1), R267(1)                                    | K69(4), A70(2)                                      | None                                                                                              | None                                                                        |
|                   | E2 Domain-A        | D7(3)                                                        | None                                                | W64(7)                                                                                            | W64(1)                                                                      |
|                   | E2 $\beta$ -linker | L152(1), L161(3),                                            | L152(2), K154(8),                                   | V157(2), Q158(15),                                                                                | V157(2), S159(1),                                                           |

|       |                        |                                                                      |                                                                                                         |                                                             |                     |
|-------|------------------------|----------------------------------------------------------------------|---------------------------------------------------------------------------------------------------------|-------------------------------------------------------------|---------------------|
|       |                        | E163(16),<br>T164(4),<br>S165(2),<br>H259(7),<br>R263(1),<br>V268(1) | D159(1),<br>L161(7),<br>S165(1),<br>R263(6),<br>L264(1),<br>T265(6),<br>P266(3),<br>T267(4),<br>V268(3) | S159(11),<br>T265(1)                                        | V264(2),<br>T265(5) |
| inter | E1<br>Domain-II        | K69(8),<br>A70(16)                                                   | K69(4),<br>A70(2)                                                                                       | K71(2), S72(5),<br>L73(2), E209(1),<br>K211(14),<br>D212(5) | None                |
|       | E2 $\beta$ -<br>linker | None                                                                 | None                                                                                                    | A164(4),<br>E165(1),<br>E166(1)                             | None                |

Close-contacts between atomic coordinates are defined as the heavy atoms within 0.39 nm.

Number of contacts per residue are indicated within parentheses.

**Table S5. Properties of chimeric protein Du-D1-Mo-D2 and Mo-D1-Du-D2 MXRA8 receptor activity for alphaviruses, Related to Figure 6.**

| <b>Virus</b> | <b>Infection enhanced by cell surface expression of Du-D1-Mo-D2 MXRA8</b> | <b>Infection enhanced by cell surface expression of Mo-D1-Du-D2 MXRA8</b> | <b>Binding of Du-D1-Mo-D2 MXRA8-Fc to surface of infected cells</b> | <b>Inhibition of infection by Du-D1-Mo-D2 MXRA8-Fc</b> | <b><i>In vivo</i> protection by Du-D1-Mo-D2 N66R MXRA8-Fc</b> |
|--------------|---------------------------------------------------------------------------|---------------------------------------------------------------------------|---------------------------------------------------------------------|--------------------------------------------------------|---------------------------------------------------------------|
| SINV         | ✓                                                                         | X                                                                         | ✓                                                                   | ✓                                                      | -                                                             |
| SINV-WEEV    | ✓                                                                         | X                                                                         | ✓                                                                   | ✓                                                      | ✓                                                             |
| SINV-VEEV    | -                                                                         | -                                                                         | X                                                                   | -                                                      | -                                                             |
| SINV-CHIKV   | ✓                                                                         | X                                                                         | ✓                                                                   | ✓                                                      | ✓                                                             |
| MAYV         | ✓                                                                         | X                                                                         | ✓                                                                   | -                                                      | -                                                             |

✓, yes; X, no; -, not tested.
